# Supplementary material for: Different Weight Loss Intervention Approaches Reveal a Lack of a Common Pattern of Gut Microbiota Changes
Source: PubMed Central journal article supplement (PMC7915884; doi:10.3390/jpm11020109), 2021-02-08
Supplement: jpm-11-00109-s001.pdf [file jpm-11-00109-s001.pdf]

**Supplementary Table S1:** Description of the pathways altered in each intervention

| <b>COMMON NAME</b>                                         | <b>Pathway ID</b>  | <b>MedDiet</b> | <b>Superclasses</b>                                                                                                                                                                                                                                                                                                                                                                                                                                     |
|------------------------------------------------------------|--------------------|----------------|---------------------------------------------------------------------------------------------------------------------------------------------------------------------------------------------------------------------------------------------------------------------------------------------------------------------------------------------------------------------------------------------------------------------------------------------------------|
| L-lysine biosynthesis I                                    | DAPLYSINESYN-PWY   | ↑              | Biosynthesis → Amino Acid Biosynthesis → Proteinogenic Amino Acid Biosynthesis → L-lysine Biosynthesis                                                                                                                                                                                                                                                                                                                                                  |
| Superpathway of glycol metabolism and degradation          | GLYCOL-GLYOXDE-PWY | ↓              | Degradation/Utilization/Assimilation → Alcohol Degradation                                                                                                                                                                                                                                                                                                                                                                                              |
| Heterolactic fermentation                                  | P122-PWY           | ↑              | Generation of Precursor Metabolite and Energy → Fermentation → Fermentation of Pyruvate → Pyruvate Fermentation to Ethanol<br>Generation of Precursor Metabolite and Energy → Fermentation → Fermentation to Alcohols → Pyruvate Fermentation to Ethanol<br>Generation of Precursor Metabolite and Energy → Fermentation → Fermentation to Short-Chain Fatty Acids → Fermentation to Lactate                                                            |
| Bifidobacterium shunt                                      | P124-PWY           | ↑              | Degradation/Utilization/Assimilation → Carbohydrate Degradation → Sugar Degradation<br>Degradation/Utilization/Assimilation → Carboxylate Degradation → Fermentation to Acetate<br>Generation of Precursor Metabolite and Energy → Fermentation → Fermentation to Short-Chain Fatty Acids → Fermentation to Acetate<br>Generation of Precursor Metabolite and Energy → Fermentation → Fermentation to Short-Chain Fatty Acids → Fermentation to Lactate |
| Superpathway of phospholipid biosynthesis I (bacteria)     | PHOSLIPSYN-PWY     | ↑              | Biosynthesis → Fatty Acid and Lipid Biosynthesis → Phospholipid Biosynthesis                                                                                                                                                                                                                                                                                                                                                                            |
| Reductive TCA cycle II                                     | PWY-5392           | ↑              | Degradation/Utilization/Assimilation → C1 Compound Utilization and Assimilation → CO2 Fixation → Autotrophic CO2 Fixation → Reductive TCA Cycles                                                                                                                                                                                                                                                                                                        |
| Acetyl-CoA fermentation to butanoate II                    | PWY-5676           | ↑              | Generation of Precursor Metabolite and Energy → Fermentation → Fermentation to Short-Chain Fatty Acids → Fermentation to Butanoate                                                                                                                                                                                                                                                                                                                      |
| Succinate fermentation to butanoate                        | PWY-5677           | ↑              | Generation of Precursor Metabolite and Energy → Fermentation → Fermentation to Short-Chain Fatty Acids → Fermentation to Butanoate                                                                                                                                                                                                                                                                                                                      |
| Superpathway of 2,3-butanediol biosynthesis                | PWY-6396           | ↑              | Biosynthesis → Other Biosynthesis → Butanediol Biosynthesis                                                                                                                                                                                                                                                                                                                                                                                             |
| Superpathway of purine deoxyribonucleosides degradation    | PWYO-1297          | ↑              | Degradation/Utilization/Assimilation → Nucleoside and Nucleotide Degradation                                                                                                                                                                                                                                                                                                                                                                            |
| Peptidoglycan maturation (meso-diaminopimelate containing) | PWYO-1586          | ↑              | Biosynthesis → Cell Structure Biosynthesis → Cell Wall Biosynthesis → Peptidoglycan Biosynthesis                                                                                                                                                                                                                                                                                                                                                        |
| Phosphatidylglycerol biosynthesis I (plastidic)            | PWY4FS-7           | ↑              | Biosynthesis → Fatty Acid and Lipid Biosynthesis → Phospholipid Biosynthesis → Phosphatidylglycerol Biosynthesis                                                                                                                                                                                                                                                                                                                                        |
| Phosphatidylglycerol biosynthesis II (non-plastidic)       | PWY4FS-8           | ↑              | Biosynthesis → Fatty Acid and Lipid Biosynthesis → Phospholipid Biosynthesis → Phosphatidylglycerol Biosynthesis                                                                                                                                                                                                                                                                                                                                        |

| <b>COMMON NAME</b>                                                         | <b>Pathway ID</b> | <b>BS</b> | <b>Superclasses</b>                                                                                                                                              |
|----------------------------------------------------------------------------|-------------------|-----------|------------------------------------------------------------------------------------------------------------------------------------------------------------------|
| O-antigen building blocks biosynthesis (E. coli)                           | OANTIGEN-PWY      | ↓         | Biosynthesis → Carbohydrate Biosynthesis → Sugar Biosynthesis → Sugar Nucleotide Biosynthesis<br><br><u>Metabolic Clusters</u>                                   |
| Glycolysis V (Pyrococcus)                                                  | P341-PWY          | ↓         | Generation of Precursor Metabolite and Energy → Glycolysis                                                                                                       |
| Pentose phosphate pathway                                                  | PENTOSE-P-PWY     | ↑         | Generation of Precursor Metabolite and Energy → Pentose Phosphate Pathways                                                                                       |
| Superpathway of CDP-glucose-derived O-antigen building blocks biosynthesis | PWY-5823          | ↑         | Biosynthesis → Carbohydrate Biosynthesis → Sugar Biosynthesis → Sugar Nucleotide Biosynthesis → CDP-sugar Biosynthesis                                           |
| Archaetidylinositol biosynthesis                                           | PWY-6350          | ↓         | Biosynthesis → Fatty Acid and Lipid Biosynthesis → Phospholipid Biosynthesis                                                                                     |
| Mono-trans, poly-cis decaprenyl phosphate biosynthesis                     | PWY-6383          | ↓         | Biosynthesis → Cofactor, Prosthetic Group, Electron Carrier, and Vitamin Biosynthesis → Polyprenyl Biosynthesis                                                  |
| Phosphopantothenate biosynthesis III (archaeobacteria)                     | PWY6654           | ↓         | Biosynthesis → Cofactor, Prosthetic Group, Electron Carrier, and Vitamin Biosynthesis → Vitamin Biosynthesis → Phosphopantothenate Biosynthesis                  |
| L-rhamnose degradation II                                                  | PWY-6713          | ↓         | Degradation/Utilization/Assimilation → Carbohydrate Degradation → Sugar Degradation → L-rhamnose Degradation                                                     |
| 7-(3-amino-3-carboxypropyl)-wyosine biosynthesis                           | PWY-7286          |           | Macromolecule Modification → Nucleic Acid Processing                                                                                                             |
| Taxadiene biosynthesis (engineered)                                        | PWY-7392          | ↓         | Biosynthesis → Secondary Metabolite Biosynthesis → Terpenoid Biosynthesis → Diterpenoid Biosynthesis                                                             |
| L-methionine salvage cycle I (bacteria and plants)                         | PWY-7528          | ↑         | Biosynthesis → Amino Acid Biosynthesis → Proteinogenic Amino Acid Biosynthesis → L-methionine Biosynthesis → L-methionine Salvage                                |
| UDP-N-acetyl-D-glucosamine biosynthesis I                                  | UDPNAGSYN-PWY     | ↓         | Biosynthesis → Carbohydrate Biosynthesis → Sugar Biosynthesis → Sugar Nucleotide Biosynthesis → UDP-sugar Biosynthesis → UDP-N-acetyl-D-glucosamine Biosynthesis |

| <b>COMMON NAME</b>                                                    | <b>Pathway ID</b>  | <b>VLCKD</b> | <b>Superclasses</b>                                                                                                                                                                                                                                                                                                                                    |
|-----------------------------------------------------------------------|--------------------|--------------|--------------------------------------------------------------------------------------------------------------------------------------------------------------------------------------------------------------------------------------------------------------------------------------------------------------------------------------------------------|
| Glycolysis III (from glucose)                                         | ANAGLYCOLYSIS-PWY  | ↑            | Generation of Precursor Metabolite and Energy → Glycolysis                                                                                                                                                                                                                                                                                             |
| L-methionine biosynthesis I                                           | HOMOSER-METSYN-PWY | ↓            | Biosynthesis → Amino Acid Biosynthesis → Proteinogenic Amino Acid Biosynthesis → L-methionine Biosynthesis → L-methionine De Novo Biosynthesis                                                                                                                                                                                                         |
| Superpathway of S-adenosyl-L-methionine biosynthesis                  | MET-SAM-PWY        | ↓            | <u>Superpathways</u>                                                                                                                                                                                                                                                                                                                                   |
| Entner-Doudoroff pathway II (non-phosphorylative)                     | NPGLUCAT-PWY       | ↓            | Degradation/Utilization/Assimilation → Carbohydrate Degradation → Sugar Degradation → Entner-Duodoroff Pathways<br>Generation of Precursor Metabolite and Energy → Entner-Duodoroff Pathways                                                                                                                                                           |
| Superpathway of (R,R)-butanediol biosynthesis                         | P125-PWY           | ↑            | Biosynthesis → Other Biosynthesis → Butanediol Biosynthesis                                                                                                                                                                                                                                                                                            |
| superpathway of N-Acetylneuraminate degradation                       | P441-PWY           | ↑            | Degradation/Utilization/Assimilation → Carboxylate Degradation                                                                                                                                                                                                                                                                                         |
| pentose phosphate pathway                                             | PENTOSE-P-PWY      | ↑            | Generation of Precursor Metabolite and Energy → Pentose Phosphate Pathways                                                                                                                                                                                                                                                                             |
| Urea cycle                                                            | PWY-4984           | ↑            | Degradation/Utilization/Assimilation → Inorganic Nutrient Metabolism → Nitrogen Compound Metabolism                                                                                                                                                                                                                                                    |
| S-adenosyl-L-methionine cycle I                                       | PWY-6151           | ↓            | Biosynthesis → Amino Acid Biosynthesis → Proteinogenic Amino Acid Biosynthesis → L-methionine Biosynthesis → L-methionine Salvage → S-adenosyl-L-methionine cycle                                                                                                                                                                                      |
| Starch biosynthesis                                                   | PWY-622            | ↑            | Biosynthesis → Carbohydrate Biosynthesis → Glycan Biosynthesis → Polysaccharide Biosynthesis → Glycogen and Starch Biosynthesis<br>Biosynthesis → Carbohydrate Biosynthesis → Polysaccharide Biosynthesis → Glycogen and Starch Biosynthesis<br>Glycan Pathways → Glycan Biosynthesis → Polysaccharide Biosynthesis → Glycogen and Starch Biosynthesis |
| CMP-legionaminate biosynthesis I                                      | PWY-6749           | ↑            | Biosynthesis → Carbohydrate Biosynthesis → Sugar Biosynthesis → Sugar Nucleotide Biosynthesis → CMP-sugar Biosynthesis → CMP-legionaminate biosynthesis                                                                                                                                                                                                |
| Superpathway of glucose and xylose degradation                        | PWY-6901           | ↑            | Degradation/Utilization/Assimilation → Carbohydrate Degradation → Sugar Degradation                                                                                                                                                                                                                                                                    |
| paromamine biosynthesis II                                            | PWY-7022           | ↑            | Biosynthesis → Secondary Metabolite Biosynthesis → Antibiotic Biosynthesis → Paromamine Biosynthesis                                                                                                                                                                                                                                                   |
| UDP-2,3-diacetamido-2,3-dideoxy- $\alpha$ -D-mannuronate biosynthesis | PWY-7090           | ↑            | Biosynthesis → Carbohydrate Biosynthesis → Sugar Biosynthesis → Sugar Nucleotide Biosynthesis → UDP-sugar Biosynthesis                                                                                                                                                                                                                                 |
| Superpathway of pyrimidine deoxyribonucleotides de novo biosynthesis  | PWY-7211           | ↓            | Biosynthesis → Nucleoside and Nucleotide Biosynthesis → 2'-Deoxyribonucleotide Biosynthesis → Pyrimidine Deoxyribonucleotide De Novo Biosynthesis                                                                                                                                                                                                      |

|                                                                                        |           |   |                                                                                                                                                                                                    |
|----------------------------------------------------------------------------------------|-----------|---|----------------------------------------------------------------------------------------------------------------------------------------------------------------------------------------------------|
|                                                                                        |           |   | Biosynthesis → Nucleoside and Nucleotide Biosynthesis → Pyrimidine Nucleotide Biosynthesis → Pyrimidine Nucleotide De Novo Biosynthesis → Pyrimidine Deoxyribonucleotide De Novo Biosynthesis      |
| Superpathway of UDP-N-acetylglucosamine-derived O-Antigen building blocks biosynthesis | PWY-7332  | ↑ | Biosynthesis → Carbohydrate Biosynthesis → Sugar Biosynthesis → Sugar Nucleotide Biosynthesis → UDP-sugar Biosynthesis                                                                             |
| β-(1,4)-mannan degradation                                                             | PWY-7456  | ↑ | Degradation/Utilization/Assimilation → Carbohydrate Degradation → Polysaccharide Degradation<br>Degradation/Utilization/Assimilation → Polymeric Compound Degradation → Polysaccharide Degradation |
| tRNA processing                                                                        | PWYO-1479 | ↓ | Macromolecule Modification → Nucleic Acid Processing                                                                                                                                               |
